# Supplementary material for: 3D self-supported hierarchical core/shell structured MnCo2O4@CoS arrays for high-energy supercapacitors
Source: Royal Society of Chemistry journal article supplement (doi:10.1039/c7ta10140f), 2017-12-21
Supplement: c7ta10140f1.pdf [file c7ta10140f1.pdf]

## Supplementary Information

### 3D self-supported hierarchical core/shell structured $\text{MnCo}_2\text{O}_4@\text{CoS}$ arrays for high-energy supercapacitors

Guijing Liu<sup>a</sup>, Bo Wang<sup>a,b,\*</sup>, Tong Liu<sup>a</sup>, Lei Wang<sup>a</sup>, Hao Luo<sup>a</sup>, Tiantian Gao<sup>a</sup>, Fei Wang<sup>a</sup>, Anmin Liu<sup>c</sup>, and Dianlong Wang<sup>a,\*</sup>

<sup>a</sup> MIIT Key Laboratory of Critical Materials Technology for New Energy Conversion and Storage, School of Chemistry and Chemical Engineering, Harbin Institute of Technology, 150001 Harbin, China.

<sup>b</sup> School of Materials Science and Engineering, Harbin Institute of Technology, 150001 Harbin, China.

<sup>c</sup> School of Petroleum and Chemical Engineering, Dalian University of Technology, 124221, Panjin, China.

\* Corresponding author. Fax: +86 45186413721; Tel: +86 45186413751.

E-mail address:

[wangbo19880804@163.com](mailto:wangbo19880804@163.com) (B. Wang),

[wangdianlonghit@163.com](mailto:wangdianlonghit@163.com) (D. L. Wang).

## Capacitance Calculation

The mass ratio of the positive and negative electrodes should be calculated by the following relationship  $q_+ = q_-$ . The charge balance will according to the following the Equation:  $q = C_s \times \Delta E \times m_{ac}$ , where  $C_s$  is specific capacitance of electrode,  $\Delta E$  is the potential range of the charge/discharge process, and  $m_{ac}$  is the mass of the electroactive material in electrode.

The capacitance values were calculated from GCD curves according to the following equations:  $C_s = I \times \Delta t / (\Delta V \times m)$ . Energy density ( $E$ , Wh·kg<sup>-1</sup>) and power density ( $P$ , W·kg<sup>-1</sup>) of the supercapacitor were calculated by the following equations:  $E = 0.5 \times C_{cell} \times (\Delta V)^2 / 3.6$  and  $P = E \times 3600 / (\Delta t)$ , where the specific capacitance ( $C_s$ , F·g<sup>-1</sup>) applies to a single electrode and the cell capacitance ( $C_{cell}$ , F·g<sup>-1</sup>) applies to the full cell only,  $I$  (A) is the charge-discharge current,  $\Delta V$  (V) is the voltage change during the discharge process after potential drop ( $iR_{drop}$ ),  $\Delta t$  (s) is the discharge time,  $m$  (g) is the mass of the electroactive material on the single electrodes and  $M$  (g) is the total mass of the electroactive materials on the both the positive and negative electrodes.

The specific capacitance of the electrode can be calculated from the CV curves according to the following equation:

$$C_s = (\int I dV) / (v m_{ac} V),$$

where  $I$  (A) is the response current,  $V$  (V) is the potential,  $v$  is the potential scan rate (mV·s<sup>-1</sup>), and  $m_{ac}$  (g) is the mass of the electroactive material in electrode.

## Figures

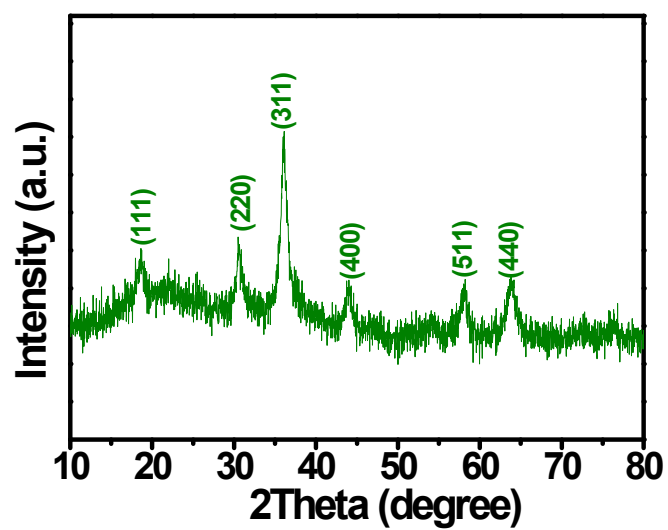

**Fig. S1†** The typical XRD pattern of the MnCo<sub>2</sub>O<sub>4</sub> nanosheet arrays scratched from Ni foam.

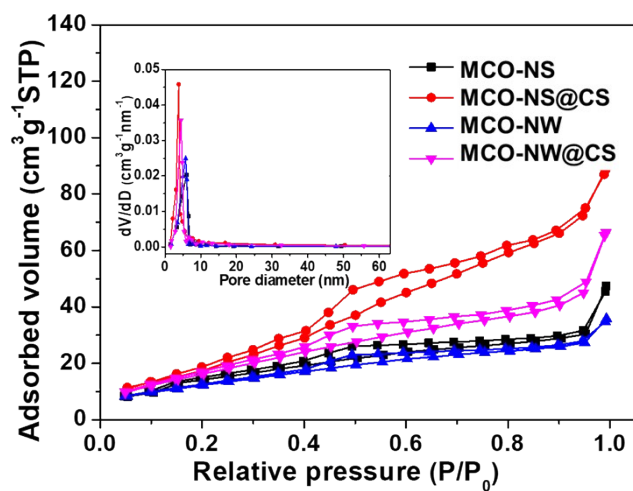

**Fig. S2†** The N<sub>2</sub> adsorption-desorption isotherm of MCO-NS, MCO-NS @CS, MCO-NW, and MCO-NW @CS and the inset shows the BJH pore size distribution.

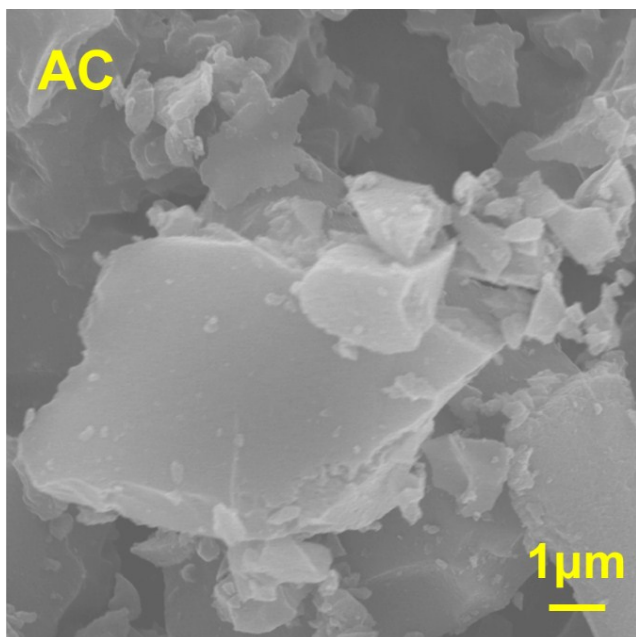

**Fig. S3†** SEM image of the active carbon (AC).

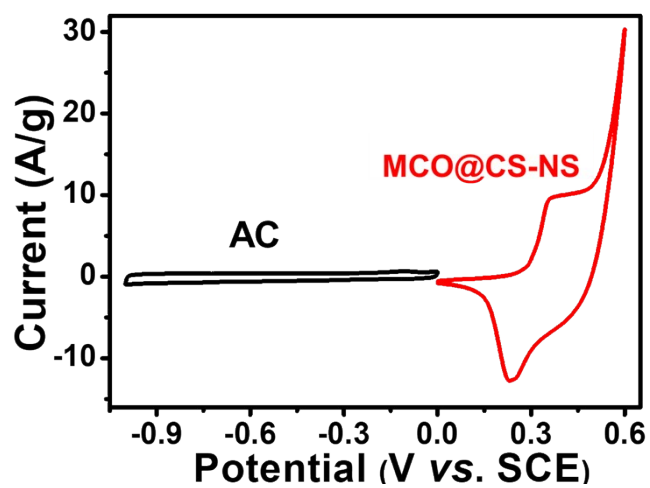

**Fig. S4†** CV curves of supercapacitor based on AC and MCO@CS-NS at a 5 mV·s<sup>-1</sup> scan rate.

## Tables

**Table. S1†** Elemental composition of the MCO-NW@CS determined using XPS.

| Element | Mn   | Co    | O     | S    |
|---------|------|-------|-------|------|
| at%     | 9.14 | 23.40 | 43.68 | 3.28 |

From the data of XPS, the mass percentages of CoS in MCO-NW@CS could be confirmed to be about 11.11 wt.%.
